# Supplementary material for: Loess formation and chronology at the Palaeolithic key site Rheindahlen, Lower Rhine Embayment, Germany
Source: Copernicus journal article supplement (doi:10.5194/egqsj-73-41-2024), 2024-01-26
Supplement: Supplementary file 1 [file egqsj-73-41-2024-supplement.pdf]

Supplement of E&G Quaternary Sci. J., 73, 41–67, 2024  
<https://doi.org/10.5194/egqsj-73-41-2024-supplement>  
© Author(s) 2024. CC BY 4.0 License.

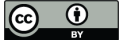

Open Access  
**E&G** Quaternary  
Science  
Journal

*Supplement of*

## **Loess formation and chronology at the Palaeolithic key site Rheindahlen, Lower Rhine Embayment, Germany**

**Martin Kehl et al.**

*Correspondence to:* Martin Kehl (kehlm@uni-koblenz.de)

The copyright of individual parts of the supplement might differ from the article licence.

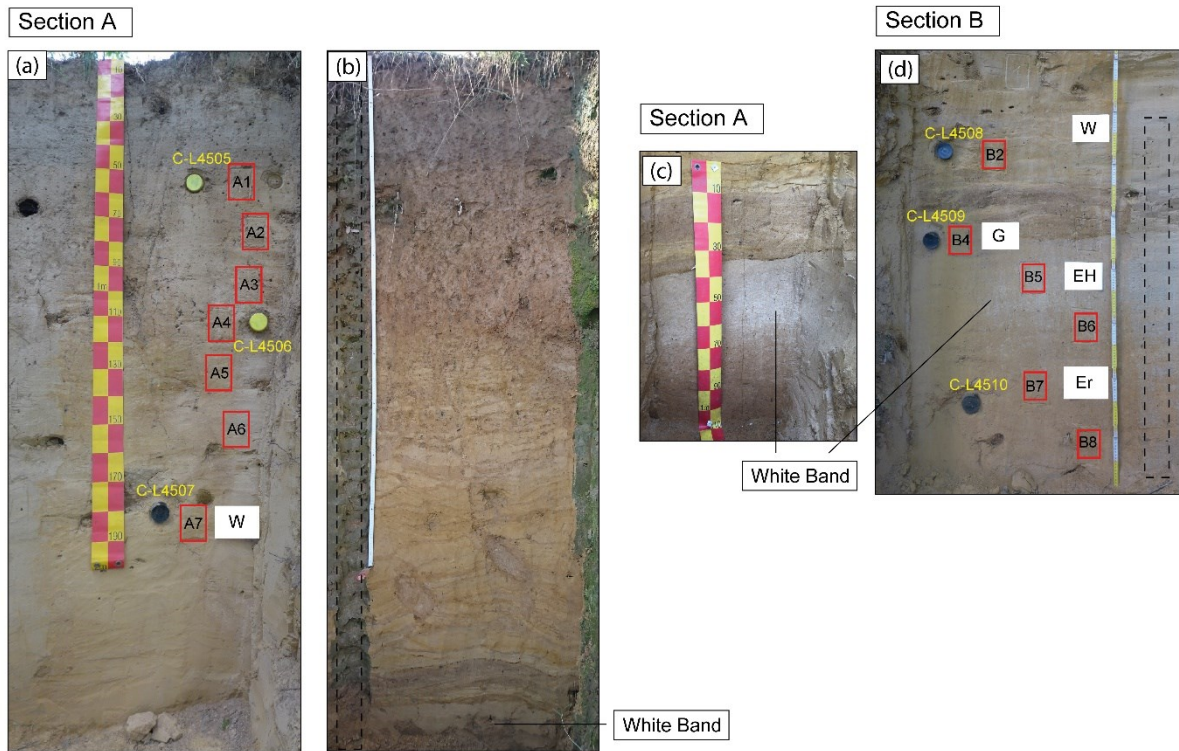

Fig. S1: Sections A and B of Profile 5 at Rheindahlen with loess layers according to Schirmer (2002), sample locations for micromorphology (red squares) and luminescence dating (yellow or black plastic caps) as well as sampling columns for sedimentology (dashed rectangles). (a) The profile was very dry at the time of sampling for micromorphology and luminescence. (b) Same as (a) but in a moist state and after sampling for sedimentology. Note the network of brown bands and presence of two burrows in the lower half of the section. (c) In section A, the white band is truncated by the erosional discontinuity, whereas a thin layer of brownish loess (presumably the Gilgau Loess of Schirmer, 2002) is preserved on the left side of section B (d).

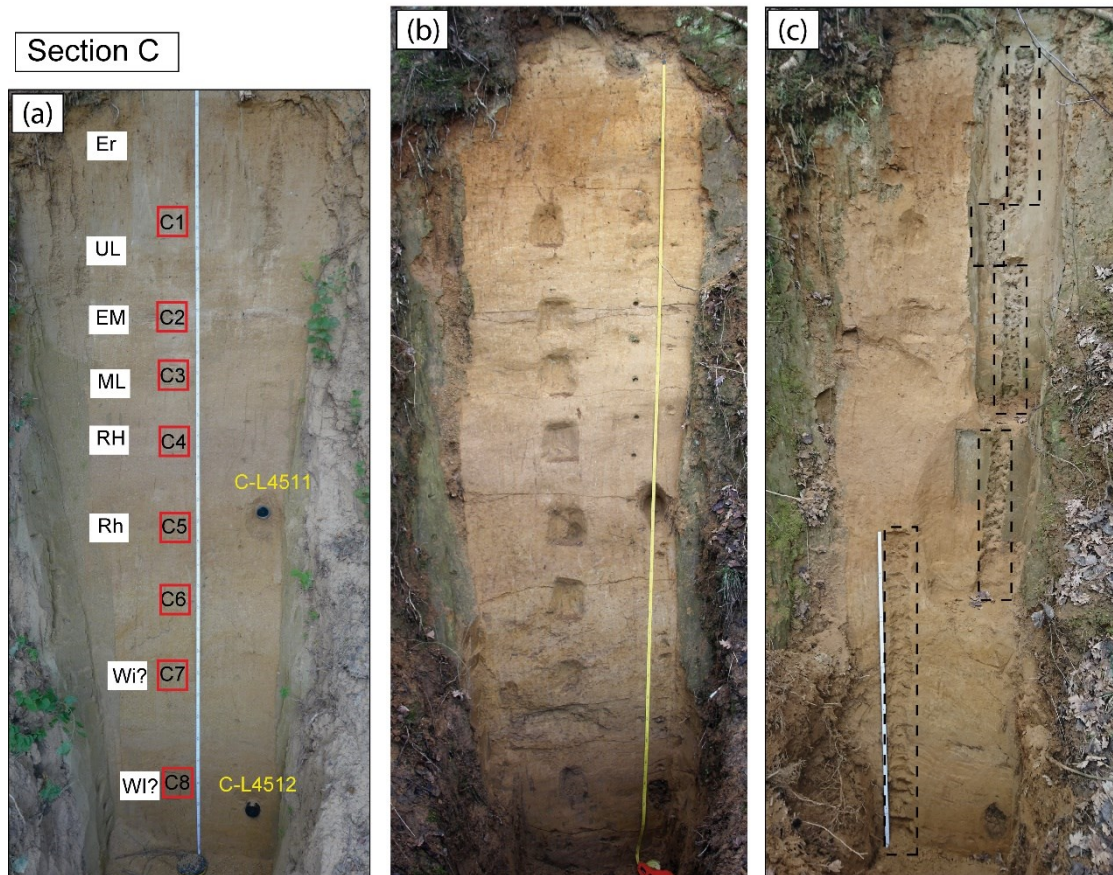

Fig. S2: Section C of Profile 5 at Rheindahlen with loess layers according to Schirmer (2002), sample locations for micromorphology (red squares) and luminescence dating (black plastic caps) as well as sampling columns for sedimentology (dashed rectangles). (a) In a dry state, colour differences are hardly detectable. (b) Same as (a) but after sampling for micromorphology and luminescence in a slightly moister state, when layers are clearly visible. (c) The section after sampling for sedimentology.

Table S1: Luminescence measurement protocols used in this study.

| <b>a) Quartz SAR protocol</b>                          |                                      |                                             |
|--------------------------------------------------------|--------------------------------------|---------------------------------------------|
| Step                                                   | Treatment                            | Observe                                     |
| 1                                                      | Preheat (240 °C for 10 s)            |                                             |
| 2                                                      | Blue OSL (LEDs) for 40 s at 125 °C   | Lx (OSL)                                    |
| 3                                                      | Test dose                            |                                             |
| 4                                                      | Cutheat (220 °C)                     |                                             |
| 5                                                      | Blue OSL (LEDs) for 40 s at 125 °C   | Tx (OSL)                                    |
| 6                                                      | Regenerative dose (R1–4, R0, RR, DR) |                                             |
| 7                                                      | Return to step 1                     |                                             |
| <b>b) IR<sub>50</sub> protocol</b>                     |                                      |                                             |
| Step                                                   | Treatment                            | Observe                                     |
| 1                                                      | Preheat (250 °C for 10s)             |                                             |
| 2                                                      | IRSL (LEDs) for 300 s at 50 °C       | Lx (IR <sub>50</sub> )                      |
| 3                                                      | Test dose                            |                                             |
| 4                                                      | Preheat (250 °C for 10s)             |                                             |
| 5                                                      | IRSL (LEDs) for 300 s at 50 °C       | Tx (IR <sub>50</sub> )                      |
| 6                                                      | Regenerative dose (R1–4, R0, RR)     |                                             |
| 7                                                      | Return to step 1                     |                                             |
| <b>c) pIR<sub>50</sub> IRSL<sub>290</sub> protocol</b> |                                      |                                             |
| Step                                                   | Treatment                            | Observe                                     |
| 1                                                      | Preheat (320 °C for 60s)             |                                             |
| 2                                                      | IRSL (LEDs) for 200 s at 50 °C       |                                             |
| 3                                                      | IRSL (LEDs) for 200 s at 290 °C      | Lx (pIR <sub>50</sub> IRSL <sub>290</sub> ) |
| 4                                                      | Test dose                            |                                             |
| 5                                                      | Preheat (320 °C for 60s)             |                                             |
| 6                                                      | IRSL (LEDs) for 200 s at 50 °C       |                                             |
| 7                                                      | IRSL (LEDs) for 200 s at 290 °C      | Tx (pIR <sub>50</sub> IRSL <sub>290</sub> ) |
| 8                                                      | IRSL (LEDs) for 100 s at 325 °C      |                                             |
| 9                                                      | Regenerative dose (R1–4, R0, RR)     |                                             |
| 10                                                     | Return to step 1                     |                                             |

Table S2: Radionuclide content and environmental dose rate for all samples of this study.

| Sample ID | Depth<br>(m b.s.) | Water<br>content<br>(%) | Radionuclide content |            |           | Q<br>Dose rate<br>(Gy/ka) | IR <sub>50</sub><br>Dose rate<br>(Gy/ka) | pIR <sub>50</sub><br>IRSL <sub>290</sub><br>Dose rate<br>(Gy/ka) |
|-----------|-------------------|-------------------------|----------------------|------------|-----------|---------------------------|------------------------------------------|------------------------------------------------------------------|
|           |                   |                         | U (ppm)              | Th (ppm)   | K (%)     |                           |                                          |                                                                  |
| C-L4505   | 0.55              | 18±5                    | 3.32±0.15            | 10.26±0.52 | 1.60±0.03 | 2.82±0.10                 | -                                        | -                                                                |
| C-L4506   | 1.10              | 18±5                    | 3.16±0.14            | 10.02±0.50 | 1.56±0.03 | 2.71±0.10                 | -                                        | -                                                                |
| C-L4507   | 1.80              | 18±5                    | 3.37±0.15            | 11.37±0.62 | 1.58±0.03 | 2.84±0.11                 | 3.82±0.14                                | 4.30±0.24                                                        |
| C-L4508   | 2.20              | 18±5                    | 4.24±0.18            | 14.92±0.78 | 1.55±0.03 | -                         | 4.42±0.16                                | 5.04±0.29                                                        |
| C-L4509   | 2.50              | 18±5                    | 3.39±0.15            | 11.13±0.55 | 1.44±0.03 | -                         | 3.66±0.13                                | 4.14±0.23                                                        |
| C-L4510   | 3.10              | 18±5                    | 2.70±0.12            | 11.66±0.63 | 1.56±0.03 | -                         | 3.57±0.13                                | -                                                                |
| C-L4511   | 5.10              | 18±5                    | 2.86±0.13            | 11.34±0.57 | 1.74±0.03 | -                         | 3.73±0.13                                | -                                                                |
| C-L4512   | 6.50              | 18±5                    | 3.13±0.14            | 12.44±0.68 | 1.69±0.03 | -                         | 3.86±0.14                                | -                                                                |

Table S3: Micromorphological characterization of thin sections from Rheindahlen: Pores, aggregation, microstructure and groundmass properties.

Key: Porosity: l: low, m: medium, h: high, vh: very high; Pedality, ped separation: w: weakly, m: moderately, s: strongly, d: developed, s: separated; Pore type: ch: channels, chb: chambers, cdpv: compound packing voids (between aggregates), pl: planes, vu: vughs, bur: burrows; Microstructure: ab, sb: angular blocky, subangular blocky, cha: channel, chb: chamber, com: complex, cru: crumb, gr: granular, ma: massive, pla: platy, spo: spongy, vug: vughy, sg: single grain; c/ ratio:coarse/fine-ratio; Sand: f: few, vf: very few sand grains; c/f rdp: coarse/fine-related distribution: cpor, opor: close or open porphyric, m: monic, chi: chitonic; colour code see Table S4; Limp.: limpidity, here dotted; b-fabric: un: undifferentiated; stsp: stipple-speckled, mosp: mosaic-speckled, grstr: granostriated, parstr: parallel striated

| #  | Depth<br>cm | Horizon | Porosity | Pore type                  | Pedality                  | Microstructure   | c/f ratio | Sand  | c/f rdp       | Colour   | Limp. | b-fabric              | Other                                    |
|----|-------------|---------|----------|----------------------------|---------------------------|------------------|-----------|-------|---------------|----------|-------|-----------------------|------------------------------------------|
| A1 | 56          | M       | vh       | bur, ch, cdpv, vf<br>pl    | vf peds, wd, ws           | spo, sb          | 85/15     | f fS  | fm, cpor      | br       | dot   | un, stsp              | Organic stains,<br>pieces of<br>charcoal |
| A2 | 74          | MBtg    | vh       | bur, ch, cdpv, vf<br>pl    | f peds, wd, ws            | spo, sb          | 80/20     | f fS  | fm, cpor      | br       | dot   | stsp                  | Organic stains                           |
| A3 | 96          | Bt1     | h        | chb, ch, vu, pla           | f peds, md, ms            | sb               | 80/20     | vf fS | cpor          | br       | dot   | stsp, mosp            |                                          |
| A4 | 113         | Bt2     | h        | chb, ch, vu, cdpv          | md, ms peds               | sb, ma           | 75/25     | f fS  | cpor, fm      | br       | dot   | stsp, mosp            |                                          |
| A5 | 132         | BCt     | m, h     | ch, bu, chb, pla           | vf sub peds and<br>plates | ma, cha, pla     | 75/25     | vf fS | cpor, fm      | lbr, br  | dot   | grstr, stsp           |                                          |
| A6 | 153         | BC(t)1  | l        | cha, chb, bur,<br>vug, pla | 0                         | ma, cha          | 80/20     | f fS  | cpor, fm      | lbr      | dot   | stsp, grstr           |                                          |
| A7 | 184         | BC(t)2  | m        | cha, bur, vu               | 0                         | ma, cha, pla     | 80/20     | vf fS | cpor, chi/ fm | gr br    | dot   | stsp, grstr           |                                          |
| B2 | 217         | BC1     | l        | spv, cha                   | 0                         | ma, sg           | 90/10     | nf    | fm/chi        | lbr      | dot   | grstr, stsp           |                                          |
| B4 | 251         | BC3     | l        | pla, cha, bur              | f peds, wd, ms            | pla, sb          | 80/20     | nf    | cpor          | br       | dot   | stsp                  |                                          |
| B5 | 266         | E1      | l        | vu, pla                    | f peds, wd, ms            | ma, pla, lent    | 80/20     | nf    | cpor/fm       | lbr      | dot   | stsp, grstr           |                                          |
| B6 | 284         | E+Bt    | l        | vu, pla, cdpv              | m peds, md, ss            | sb, pla          | 80/20     | nf    | cpor/fm       | br       | dot   | stsp                  |                                          |
| B7 | 305         | Bt      | m        | pla, cdpv, chb,<br>bur     | m peds, md, ms            | sb, pol, pla     | 65/35     | nf    | cpor, chi     | br       | dot   | most, stsp,<br>parstr |                                          |
| B8 | 325         | Bt      | m        | cdpv, chb, vu              | m peds, md, ms            | sb, pla          | 70/30     | nf    | cpor-opor     | br       | dot   | stsp, parstr          |                                          |
| C1 | 375         | BCt     | h        | cha, chb, bur, vu          | f peds, wd, ws            | cha, ma, sb      | 75/25     | nf    | cpor, chi/fm  | br       | dot   | stsp, grstr           |                                          |
| C2 | 420         | BC1     | h        | cha, bur, vu, pla          | vf peds, wd, ws           | cha, ma, sb      | 80/20     | nf    | cpor/fm       | lbr      | dot   | stsp                  |                                          |
| C3 | 449         | BC2     | h        | cha, bur, vu, pla          | 0                         | ma, vug          | 80/20     | nf    | cpor/fm       | lgr, lbr | dot   | stsp                  |                                          |
| C4 | 482         | E       | m        | cha, chb, bur              | 0                         | ma, cha          | 80/20     | nf    | cpor/fm       | lbr, br  | dot   | stsp                  |                                          |
| C5 | 524         | Btg     | m, h     | bur, pla, cha              | f peds, md, ms            | ab, ma, cha, pla | 70/30     | nf    | cpor          | br       | dot   | stsp, mosp            |                                          |
| C6 | 557         | BCg(t)  | m        | cha, chb, bur              | f peds, wd, ws            | ma, cha, sb      | 70/30     | nf    | cpor          | lbr, dbr | dot   | stsp                  |                                          |
| C7 | 594         | Bwg(t)  | h        | cha, pl, bur               | f peds, md, ms            | ma, pla, cha     | 70/30     | nf    | cpor          | br       | dot   | stsp                  |                                          |
| C8 | 644         | Bwg(t)  | h        | cha, bur, pla              | vf peds, vwd,<br>vws      | ma, cha          | 70/30     | nf    | cpor          | br, dbr  | dot   | stsp                  |                                          |

Table S4: Micromorphological characterization of thin sections from Rheindahlen: Pedofeatures.

Key: P. feat. = passage features, Excr. = excrements, ped surf. = on aggregate surfaces; fragm. = fragmented; lbr, dbr, bl, orbr = light brown, dark brown, black, orange brown; or, dis = orthic or disorthic nodule; abundance: 0 = not observed, 1 = rare, 2 = occasional, 3 = many, 4 = abundant; \* in passage feature

| #  | P. feat. | Excr. | Clay coatings |        |         | Clay + silt coatings | Fe-Mn-nodules |                   |             | Fe-Mn-depletion | Other |                                                                                    |
|----|----------|-------|---------------|--------|---------|----------------------|---------------|-------------------|-------------|-----------------|-------|------------------------------------------------------------------------------------|
|    |          |       | intact        | fragm. | papules |                      | amount        | type              | size        |                 |       |                                                                                    |
| A1 | 4        | 2     | 0             | 0      | 0       | 0                    | 1             | lbr, bl, typ      | dis         | < 1mm           | 0     |                                                                                    |
| A2 | 3        | 2     | 1             | 0      | 1       | 0                    | 3             | lbr, dbr, bl, typ | f dis, m or | < 1mm, f < 6mm  | 0     |                                                                                    |
| A3 | 3        | 1     | 3             | 0      | 1       | 1                    | 4             | br, dbr, bl, typ  | or          | < 2mm           | 3     |                                                                                    |
| A4 | 3        | 0     | 4             | 0      | 1       | 2                    | 2             | dbr, bl, typ      | or          | < 2mm           | 4     |                                                                                    |
| A5 | 3        | 0     | 3             | 0      | 1       | 2                    | 2             | dbr, bl, typ      | or          | < 2 mm          | 4     | rare Mn hypocoatings                                                               |
| A6 | 2        | 0     | 1             | 0      | 0       | 1                    | 1             | lbr, bl, typ      | or          | < 1mm           | 2     |                                                                                    |
| A7 | 3        | 0     | 3             | 0      | 1*      | 1                    | 2             | lbr, dbr          | or          | < 1mm           | 2     | occasional Mn hypocoatings                                                         |
| B2 | 2        | 0     | 2             | 0      | 2       | 0                    | 1             | lbr               | or          | < 1mm           | 1     | Clay granules                                                                      |
| B4 | 1        | 0     | 0             | 0      | 2       | 0                    | 2             | lbr, dbr          | or          | < 5mm           | 1     |                                                                                    |
| B5 | 0        | 0     | 0             | 0      | 1       | 0                    | 3             | lbr, dbr          | or          | < 5mm           | 2     | Fe nodule superimposed by Mn nodule                                                |
| B6 | 0        | 0     | 1             | 0      | 3       | 0                    | 4             | lbr, dbr          | or, dis     | < 5mm           | 2     |                                                                                    |
| B7 | 1        | 1     | 3             | 2      | 3       | 2                    | 1             | lbr, bl           | or          | < 1 mm          | 1     |                                                                                    |
| B8 | 2        | 1     | 4             | 3      | 3       | 2                    | 1             | lbr, bl           | or          | < 1 mm          | 1     |                                                                                    |
| C1 | 2        | 0     | 3             | 2      | 2       | 2                    | 1             | lbr, bl           | or          | < 1 mm          | 1     |                                                                                    |
| C2 | 1        | 0     | 1             | 1      | 1       | 0                    | 1             | lbr, bl           | or, dis     | < 1 mm          | 1     | rare Mn incomplete infillings                                                      |
| C3 | 2        | 0     | 1             | 0      | 1       | 0                    | 1             | lbr, bl           | or, dis     | < 2 mm          | 1     | rare Mn incomplete infillings                                                      |
| C4 | 0        | 0     | 1             | 0      | 0       | 0                    | 2             | lbr               | or          | < 2 mm          | 1     | rare Mn incomplete infillings                                                      |
| C5 | 1        | 0     | 3             | 2      | 2       | 2                    | 2             | lbr, dbr          | or          | < 2 mm          | 1     |                                                                                    |
| C6 | 0        | 0     | 2             | 1      | 2       | 3                    | 3             | lbr, dbr, bl      | or          | < 1 mm          | 2     | rare Mn incomplete infillings                                                      |
| C7 | 1        | 0     | 3             | 1      | 1       | 2                    | 4             | lbr, dbr, bl      | or          | < 5 mm          | 3     | rare Mn incomplete infillings and and coatings; clay coats in large biogenic pores |
| C8 | 1        | 0     | 2             | 0      | 0       | 1                    | 4             | orbr, lbr, dbr    | or          | < 2 mm          | 3     | clay coats in large biogenic pores                                                 |

Table S5: Micromorphological characterization of thin sections from Rheindahlen: Further characteristics of sediment structure and evaluation of micromorphological features regarding processes of sediment accumulation and post-depositional alteration including indications for the occurrence of extended frost.

Key: abundance/degree of compaction/intensity of process: 0 = not observed/-, 1 = rare/weak, 2 = occasional/moderate, 3 = many/strong, 4 = abundant, very strong, Acc. of org. mat. = accumulation of organic matter; Redoximorph. = redoximorphic, \* very few syngenetic biogenic pores, + in the lowest part of the thin section

| #  | Sediment structure |              |         |                      | Deduced processes                |              |                   |                    |                   |                  | Frost effects                                                                        |
|----|--------------------|--------------|---------|----------------------|----------------------------------|--------------|-------------------|--------------------|-------------------|------------------|--------------------------------------------------------------------------------------|
|    | Platy structure    | Silt patches | Banding | Degree of compaction | Reworking indicated by           | Bioturbation | Acc. of org. mat. | Redoxim. bleaching | Redoxim. mottling | Clay illuviation |                                                                                      |
| A1 | 0                  | 0            | 0       | 1                    |                                  | 4            | 2                 | 0                  | 1                 | 0                | not found                                                                            |
| A2 | 0                  | 0            | 0       | 2                    |                                  | 4            | 1                 | 0                  | 2                 | 0                | not found                                                                            |
| A3 | 0                  | 2            | 0       | 3                    |                                  | 3            | 0                 | 2                  | 2                 | 2                | not found                                                                            |
| A4 | 0                  | 2            | 2       | 2                    | banding <sup>+</sup>             | 3            | 0                 | 3                  | 1                 | 2                | banding and silt pans <sup>+</sup>                                                   |
| A5 | 2                  | 3            | 2       | 3                    | banding                          | 2            | 0                 | 3                  | 1                 | 1                | banding                                                                              |
| A6 | 0                  | 1            | 3       | 4                    | banding                          | 1*           | 0                 | 1                  | 1                 | 1                | strong banding                                                                       |
| A7 | 0                  | 2            | 4       | 4                    | banding                          | 1*           | 0                 | 1                  | 1                 | 2                | strong banding                                                                       |
| B2 | 0                  | 1            | 0       | 4                    | cross-bedding                    | 1*           | 0                 | 1                  | 1                 | 1                | (silt patches)                                                                       |
| B4 | 3                  | 2            | 2       | 4                    |                                  | 1*           | 0                 | 1                  | 1                 | 2                | banding, silt patches, rounded peds, platy ms                                        |
| B5 | 2                  | 3            | 4       | 4                    | clay papules                     | 0            | 0                 | 2                  | 2                 | 0                | banding, silt patches, platy structure                                               |
| B6 | 2                  | 2            | 3       | 4                    | clay papules, Bt aggregates      | 0            | 0                 | 2                  | 3                 | 0                | banding, silt patches, rounded peds, platy ms                                        |
| B7 | 3                  | 0            | 0       | 4                    | clay papules, but within horizon | 1            | 0                 | 2                  | 1                 | 4                | rounded peds, platy ms, fragmented clay coatings, clay papules                       |
| B8 | 1                  | 0            | 0       | 4                    | clay papules, by frost           | 1            | 0                 | 1                  | 1                 | 5                | rounded peds, platy ms, fragmented clay coatings, clay papules, microlayering (pans) |
| C1 | 1                  | 2            | 1       | 3                    | clay papules, pans               | 1*           | 0                 | 1                  | 1                 | 3                | rounded peds, fragmented clay coatings, clay papules, microlayering (pans)           |
| C2 | 1                  | 2            | 1       | 3                    | ice wedge casts, pans            | 1*           | 0                 | 1                  | 1                 | 2                | ice wedge casts, fragmented clay coatings, clay papules, microlayering (pans)        |
| C3 | 1                  | 2            | 1       | 3                    |                                  | 1*           | 0                 | 1                  | 1                 | 1                | silt patches, weak banding                                                           |
| C4 | 1                  | 2            | 1       | 3                    |                                  | 0            | 0                 | 1                  | 1                 | 1'               | silt patches, weak banding                                                           |
| C5 | 2                  | 0            | 0       | 3                    |                                  | 1            | 0                 | 1                  | 1                 | 3                | wedge-shaped aggregates, pans, fragmented coatings                                   |
| C6 | 1                  | 1            | 2       | 3                    |                                  | 1            | 0                 | 2                  | 2                 | 2                | banding, wedge-shaped aggregates, pans, ice-wedge pseudomorphs, clay papules         |
| C7 | 1                  | 2            | 2       | 3                    |                                  | 1            | 0                 | 3                  | 3                 | 2                | banding, wedge-shaped peds, platy ms                                                 |
| C8 | 1                  | 1            | 1       | 3                    |                                  | 1            | 0                 | 2                  | 2                 | 2                | banding, platy ms                                                                    |
